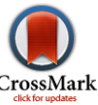

# Protein Languages Differ Depending on Microorganism Lifestyle

Joseph J. Grzymski<sup>1\*</sup>, Adam G. Marsh<sup>2\*</sup>

**1** Division of Earth and Ecosystem Sciences, Desert Research Institute, Reno, Nevada, United States of America, **2** Center for Bioinformatics and Computational Biology, Marine Biological Sciences, University of Delaware, Lewes, Delaware, United States of America

## Abstract

Few quantitative measures of genome architecture or organization exist to support assumptions of differences between microorganisms that are broadly defined as being free-living or pathogenic. General principles about complete proteomes exist for codon usage, amino acid biases and essential or core genes. Genome-wide shifts in amino acid usage between free-living and pathogenic microorganisms result in fundamental differences in the complexity of their respective proteomes that are size and gene content independent. These differences are evident across broad phylogenetic groups—a result of environmental factors and population genetic forces rather than phylogenetic distance. A novel comparative analysis of amino acid usage—utilizing linguistic analyses of word frequency in language and text—identified a global pattern of higher peptide word repetition in 376 free-living versus 421 pathogen genomes across broad ranges of genome size, G+C content and phylogenetic ancestry. This imprint of repetitive word usage indicates free-living microorganisms have a bias for repetitive sequence usage compared to pathogens. These findings quantify fundamental differences in microbial genomes relative to life-history function.

**Citation:** Grzymski JJ, Marsh AG (2014) Protein Languages Differ Depending on Microorganism Lifestyle. PLoS ONE 9(5): e96910. doi:10.1371/journal.pone.0096910

**Editor:** Christos A. Ouzounis, The Centre for Research and Technology, Hellas, Greece

**Received:** December 10, 2013; **Accepted:** April 14, 2014; **Published:** May 14, 2014

**Copyright:** © 2014 Grzymski, Marsh. This is an open-access article distributed under the terms of the Creative Commons Attribution License, which permits unrestricted use, distribution, and reproduction in any medium, provided the original author and source are credited.

**Funding:** This work was supported by the U.S. National Science Foundation, Office of Polar Programs (#02-38281 to AGM and #06-32278 to JJG). The funders had no role in study design, data collection and analysis, decision to publish, or preparation of the manuscript.

**Competing Interests:** Both authors have an ownership stake in Evozym Biologics, Inc. One of the goals of the company is to develop statistical algorithms for aiding bio-medical research. Patent S20120310544A1 entitled “Systems and methods for identifying structurally or functionally significant amino acid sequences” was filed with assignment to the Board of Regents of the Nevada System of Higher Education, on behalf of the Desert Research Institute and the University of Delaware. The authors’ universities sought patent protection on related commercial work to utilize this approach to identify selection pressures for the de novo design of new genes and proteins. The authors’ academic research efforts to describe a biological basis underpinning this algorithmic approach are not in conflict with the patent application: Marsh AG and Grzymski JJ; United States utility Patent Application No. 12-546285, filed August 24, 2009; systems and methods for identifying structurally or functionally significant amino acid sequences. There are no further patents, products in development or marketed products to declare. This does not alter the authors’ adherence to all the PLoS ONE policies on sharing data and materials.

\* E-mail: joeg@dri.edu (JJG); amarsh@udel.edu (AGM)

## Introduction

Microorganisms exhibit a wide range of environmental adaptations and lifestyles encoded by their genomes [1–5]. Our understanding of the limits of microbial life on Earth keep expanding as microbes are found in myriad, unique environments [6,7] and as synthetic biology has developed [8,9] to explore the minimum gene sets required for life [10–12]. Progress in both fields, however, is limited by lack of understanding of the genomic rule set or principles that shape gene structure and organization for either life in a specific habitat (e.g., hydrothermal vent, metazoan host, industrial bioreactor) or a defined life-history strategy (e.g., chemoautotrophy, heterotrophy, methanotrophy). Pathogens containing nearly minimal gene sets needed to survive in a host are generally considered to have smaller genome sizes and less complexity than free-living organisms [13,14]. Genome size, however, is merely a consequence of net gene loss (or gain); it cannot be used to distinguish free-living organisms from pathogens because of the broad overlap in genome sizes that exist between these two groups. Even within a broad group defined as “pathogen”, there is a range of life histories. Furthermore, recent analyses and single-cell amplified genome sequencing revealed that many oligotrophic marine microbes are cost-minimized and

have small, low GC genomes [15,16]. Genome streamlining [17] appears to be an important feature of free-living marine oligotrophic microbes [16].

Genomes are highly organized information structures [18]. Working with sequence entropy is one way to formulate information or organization in whole genome sequences [19–21]. A high level of local sequence organization can be assessed with bibliometrics where large differences in information structure are evident among different genomes [22,23]. Local sequence organization in the form of multiple alignments of amino acid blocks or short motifs has been used in protein classification for two decades [24]. An extension of this concept is maximum entropy models which have been used to characterize sequence diversity in antibodies and provide a mathematical framework for extracting quantitative information from experimental data [25]. As well, heuristic models from large environmental data sets are being used to relate genomic information to trophic lifestyle [15,26]. We focused on isolating and characterizing information content as a way to more fully understand how local amino acid sequence features can be exploited further to provide functional information about unknown or poorly characterized open reading frames (ORFs). There is a pressing need for analytical tools to

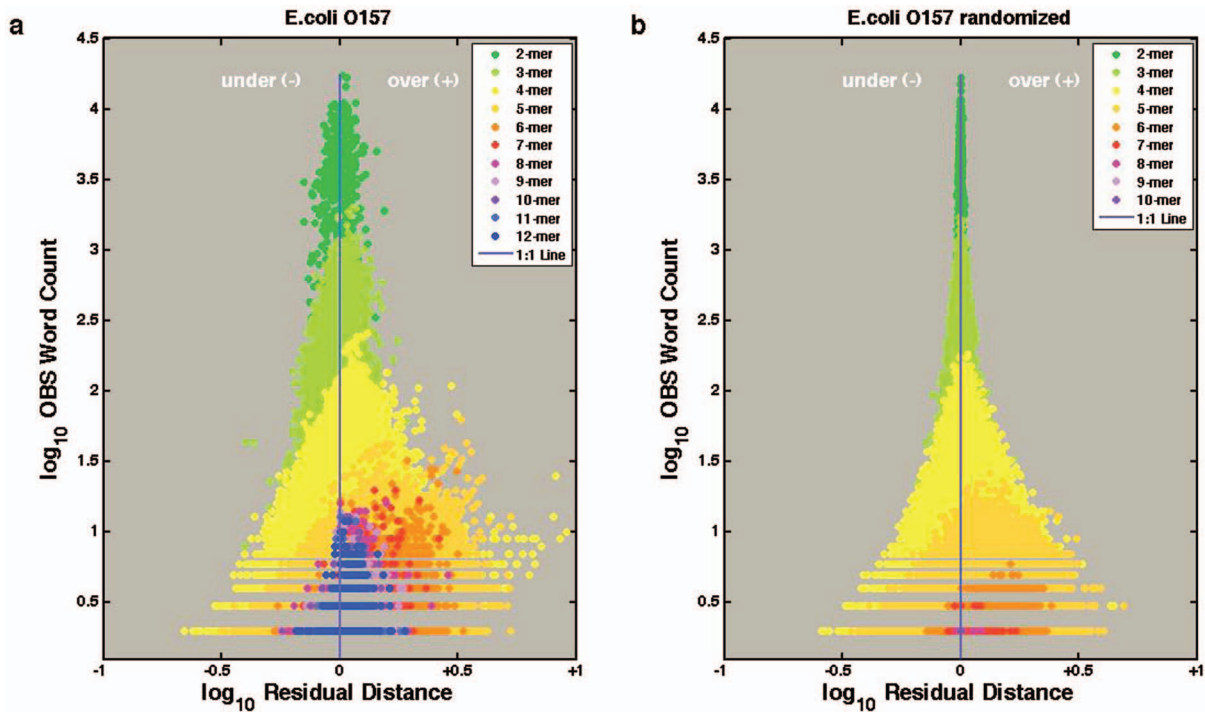

**Figure 1. E. coli O157 amino acid dictionaries.** Over- and underrepresentation of repetitive amino acid words is plotted for E. coli O157 as the residual difference between Observed and Expected counts of each word (from 2 to 12 mers). (a) Word counts of the non-redundant (cdhit 95%), protein-coding genes of the native E. coli O157 genome ( $n=555753$  repeated amino acid words); (b) Word counts after randomizing the amino acid sequence of the non-redundant, protein-coding genes of E. coli O157 ( $n=433566$  repeated amino acid words). doi:10.1371/journal.pone.0096910.g001

**Table 1.** Comparison of amino acid frequencies in all annotated proteins among free-living (Free) and pathogenic (Path) microbes.

| Amino Acid | GFM | FREE (mean frequency) | PATH (mean frequency) | p-value   |
|------------|-----|-----------------------|-----------------------|-----------|
| A          | 89  | 0.0948                | 0.0860                | 2.060e-05 |
| C          | 121 | 0.0094                | 0.0097                | NS        |
| D          | 133 | 0.0539                | 0.0531                | NS        |
| E          | 147 | 0.0635                | 0.0614                | 2.833e-03 |
| F          | 165 | 0.0396                | 0.0434                | 1.035e-11 |
| G          | 75  | 0.0756                | 0.0686                | 2.263e-16 |
| H          | 155 | 0.0199                | 0.0208                | 2.624e-04 |
| I          | 131 | 0.0647                | 0.0702                | 2.213e-04 |
| K          | 146 | 0.0515                | 0.0604                | 7.478e-07 |
| L          | 131 | 0.1021                | 0.1023                | NS        |
| M          | 149 | 0.0237                | 0.0240                | NS        |
| N          | 132 | 0.0373                | 0.0452                | 1.511e-12 |
| P          | 115 | 0.0453                | 0.0399                | 2.675e-14 |
| Q          | 147 | 0.0341                | 0.0389                | 1.220e-13 |
| R          | 174 | 0.0576                | 0.0490                | 1.103e-12 |
| S          | 105 | 0.0589                | 0.0621                | 1.061e-08 |
| T          | 119 | 0.0526                | 0.0529                | NS        |
| V          | 117 | 0.0725                | 0.0676                | 1.375e-12 |
| W          | 181 | 0.0120                | 0.0110                | 1.883e-05 |
| Y          | 204 | 0.0301                | 0.0324                | 2.772e-05 |

A Welch's two-sample t-test was used to compare the mean frequencies and test for the likelihood that the difference among Free and Path observations was not zero. This statistic essentially establishes a 95% confidence interval around the difference of means and assigns significance based on how far the observed arithmetic difference is from 0.

doi:10.1371/journal.pone.0096910.t001

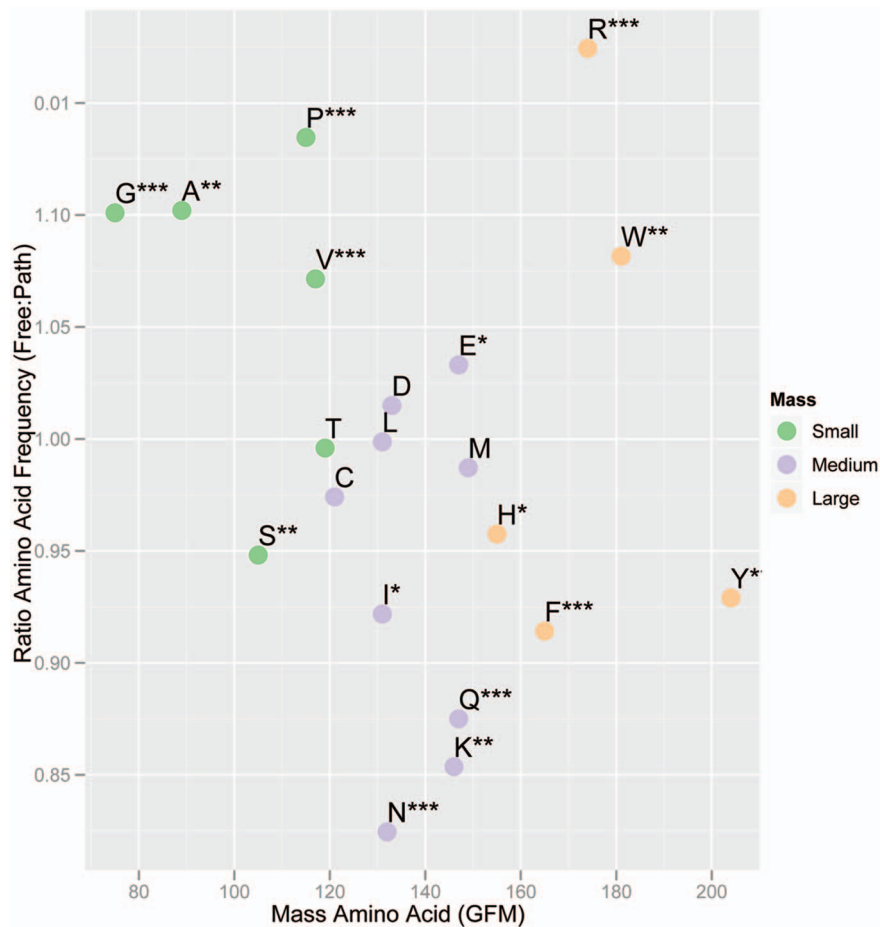

**Figure 2. Ratio of free-living and pathogen amino acid usage versus amino acid mass.** Data were plotted from the values and statistics presented in Table 1. doi:10.1371/journal.pone.0096910.g002

extract as much information as possible from all currently available genome sequences – not just well-annotated genes.

We hypothesized that any of the evolutionary bottlenecks that occur in obligate/facultative intracellular organisms (e.g., [27]) should impact the entire proteome and alter genome-wide patterns of amino acid word usage. These patterns should be evident in the broad group of organisms defined as pathogens. The goal of this analysis was to establish rule sets or pattern principles to describe genome-level differences between free-living and pathogenic bacteria arising from the major shift in gene function associated with their ecology and evolution. Our results illustrate fundamental differences in the genome architecture of free-living and pathogen genomes, independent of genome size, G+C content or phylogenetic ancestry. This approach perhaps can be exploited to reveal new information about pathogens and our attempts to control them.

## Results and Discussion

We analyzed amino acid word usage in the predicted proteomes of 797 genomes from two categories of microorganisms: free-living microbes (marine and/or terrestrial) and known pathogens (obligate or facultative; Table S1). These categories were based on keyword filters applied to National Center for Biotechnology Information (NCBI) genome submission data. The definitions “free-living” and “pathogen” have broad meanings, and this

breadth increases the variance that must be isolated in analyses, not the fundamental differences underlying these categories. For the remainder of the discussion, we refer to these groups as FREE and PATH with the understanding that many pathogens during their lifecycle are not obligately associated with a host.

Our strategy was derived from linguistic analyses of word frequency in language and text [21,28]. The predicted proteome of each genome was first pre-processed to remove duplicate or redundant proteins greater than 95% identical in sequence. This non-redundant proteome of each genome was broken into “words” from two-to-twelve amino acids long. Observed and expected frequencies of these words within a genome were compiled into reference dictionaries for data retrieval during analysis. To eliminate confounding effects of genome size and G+C content and to explore the importance of phylogenetic grouping, analyses were repeated on randomized copies of the genomes by shuffling all proteome amino acids as one large sequence string and then dividing back to the original ORF number and sizes.

The amino acid word dictionary of a genome contains frequency counts of all N mer amino acid words present in non-redundant predicted proteins. Knowing counts for any N mer length, it is trivial to calculate expected frequency of any N+1 mer in a neutral (null) recombination distribution. For example, in an organism that uses alanine 5%, the frequency of a homodipeptide AA is 0.25%. A focus of this informatic method is to provide a

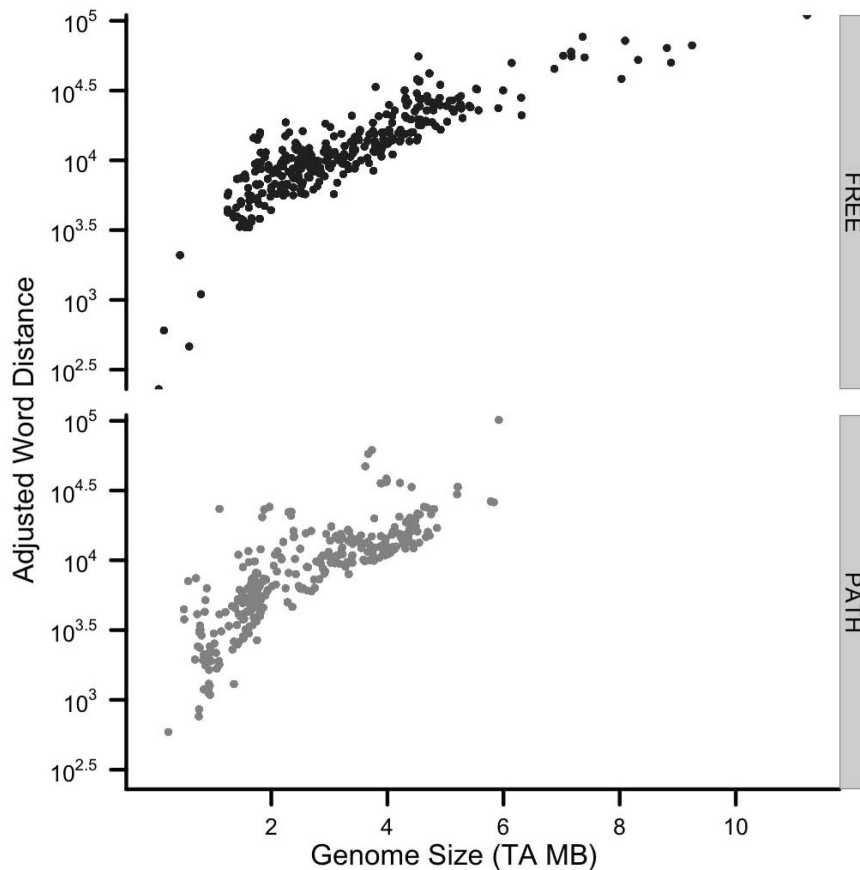

**Figure 3. Residual word distance of free-living and pathogen genomes.** Total word distance minus the random dictionary contribution (see Figure 4) plotted as a function of genome size. doi:10.1371/journal.pone.0096910.g003

statistical measure to identify motifs that are weak links in the proteome of a pathogen. Targeting these weak links could have a significant impact on pathogen survival (fitness). We assessed the severity of the retention or overrepresentation of specific words within proteins by a statistical analysis looking at amino acid word usage patterns that are in disequilibrium with the usage expected in a null selection model. In Figure 1a, observed and expected word counts for *E. coli* O157 evidence a skew toward overrepresentation (above expected values) of many amino acid words of 5 to 12 residues. By comparison, a randomized O157 genome (same amino acid usage and protein number and length; Figure 1b) shows far smaller differences between observed and expected counts, and far fewer words longer than five mers that are repeated after randomization.

Obviously, genomes are not random collections of amino acids, but the striking difference between the two panels in Figure 1 illustrates how the complexity of natural genomes can be measured in terms of overrepresentation or repetition of key amino acid words (peptide motifs). These words likely form local domains in proteins such that a singular amino acid combination is more likely to be successful as a sequence unit within a protein than other possible variants. This is a direct result of natural selection favoring retention or co-evolution of functional/structural sequence blocks [29]. As well, overrepresentation of non-functional sequence blocks could be the result of genetic drift, codon bias, or other random effects. The departure between word-observed counts and neutral expected counts thus can be considered an index of these forces driving retention or

maintenance of a word across many genes within a genome. These values are difficult to compare among genomes, however, because of differences in amino acid word usage. Even single amino acid frequencies can be highly variable (Table 1; Figure 2) [30–32]. Despite the large number and diverse genomes in this analysis, the majority of amino acids that occur in statistically significant higher frequency in PATH are greater than 130 gram formula mass (GFM) with the exception of arginine and tryptophan which are found in higher frequency in the FREE data set. The two smallest amino acids, glycine and alanine, are found in statistically higher frequency in the FREE data set despite the broad range of data (Table S1). Cost minimization requirements for FREE organisms are not as necessary in PATH [30,33]. Our method and analysis extend this argument by quantifying a metric of the complexity of higher order amino acid word usage.

The observed-minus-expected residual distance of amino acid words among 376 FREE and 421 PATH genomes differs across a broad range of phylogeny, genome size and % G+C content (see Table S1). In Figure 3, residual distances (adjusted for variation present in the randomized copy of each genome by subtraction) were plotted against genome size (calculated from the non-redundant, protein-coding regions). We found a strong relationship between size and the adjusted word distance with larger genomes utilizing higher amino acid word repetition. But the opposite trend is just as intriguing – as size decreases, there appears to be a genome minimum around 0.5 MB where the sum of the differences between observed and expected word counts would be the same as the residual distance found in their

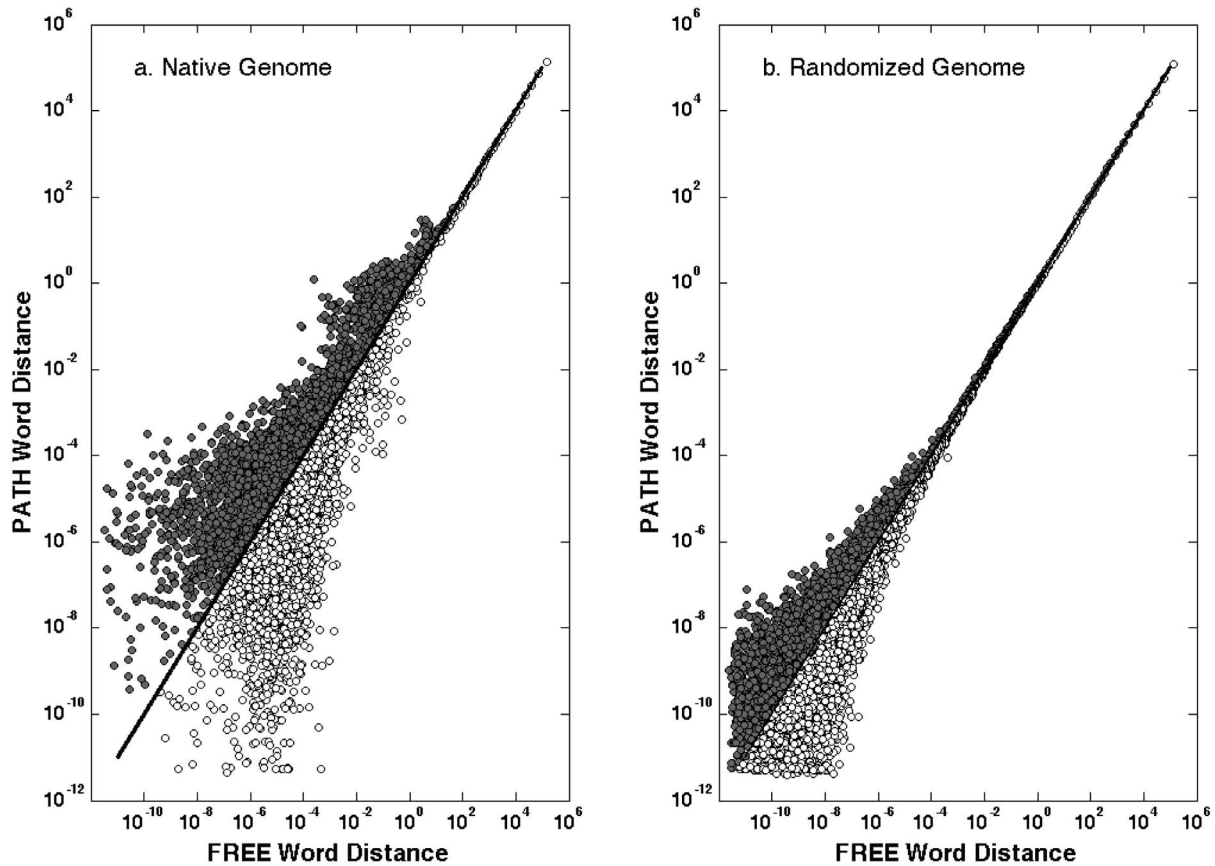

**Figure 4. Residual word distance of native and random genomes.** Residual word distances for individual genomes in free-living ( $n=376$ ) and human-pathogen ( $n=421$ ) microbes were divided into class levels based on the number of times words were repeated within a genome, from 2 to 30,000. A group mean of the word distance at each repeat level was calculated and plotted above as FREE vs. PATH for the native genome data set (a) and the randomized genome data set (b).  
doi:10.1371/journal.pone.0096910.g004

randomized versions. Although the limit in this plot has a wide confidence interval, it raises two timely questions: 1) what are the smallest free-living vs. pathogen genome sizes possible? and 2) what is it about amino acid word usage that impacts gene composition to determine those size limits?

In order to compare total word utilization patterns among FREE and PATH genomes, we reduced the 2-to-12 mer amino acid word dictionaries of each genome and an identical, randomized copy to a 30,000 element vector with each  $i^{\text{th}}$  element representing total residual distance between observed and expected counts in that dictionary for all words repeated  $i$  times. This finite vector condensed amino acid word dictionaries into a numerical array directly comparable among genomes. Here, the sum of the observed minus expected deviations in amino acid words repeated between 2 and 30,000 times is independent of either the length of those words or their specific amino acid sequence. We described the degree to which some local domain sequences were retained across many genes within a genome by comparing distributions of these word counts. The fundamental differences between the two groups are highlighted in a comparison plot of these data for native and randomized genomes (Figure 4). This phenomenon is not a function of genome size, localized regions in a genome, or phylogeny. If it were, then the native and random plots would not differ significantly. Furthermore, there would be no evidence of difference in the native genomes of FREE versus PATH (Figure 4a). The asymmetric

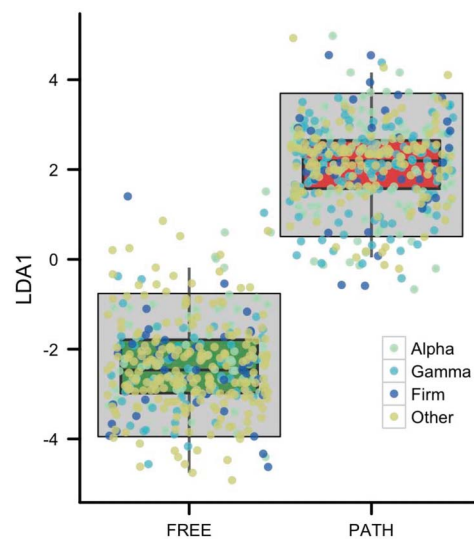

**Figure 5. LDA plot with color-coded phylogenetic groups.** Linear discriminant analysis of the repeat bin word distance results (Figure 4) between free-living and pathogen genomes. The gray box represents statistical significance ( $p < 10^{-6}$ ). The points of genomes from the three largest phylogenetic groups in the data set are highlighted to show no phylogenetic significance of differences in groups.  
doi:10.1371/journal.pone.0096910.g005



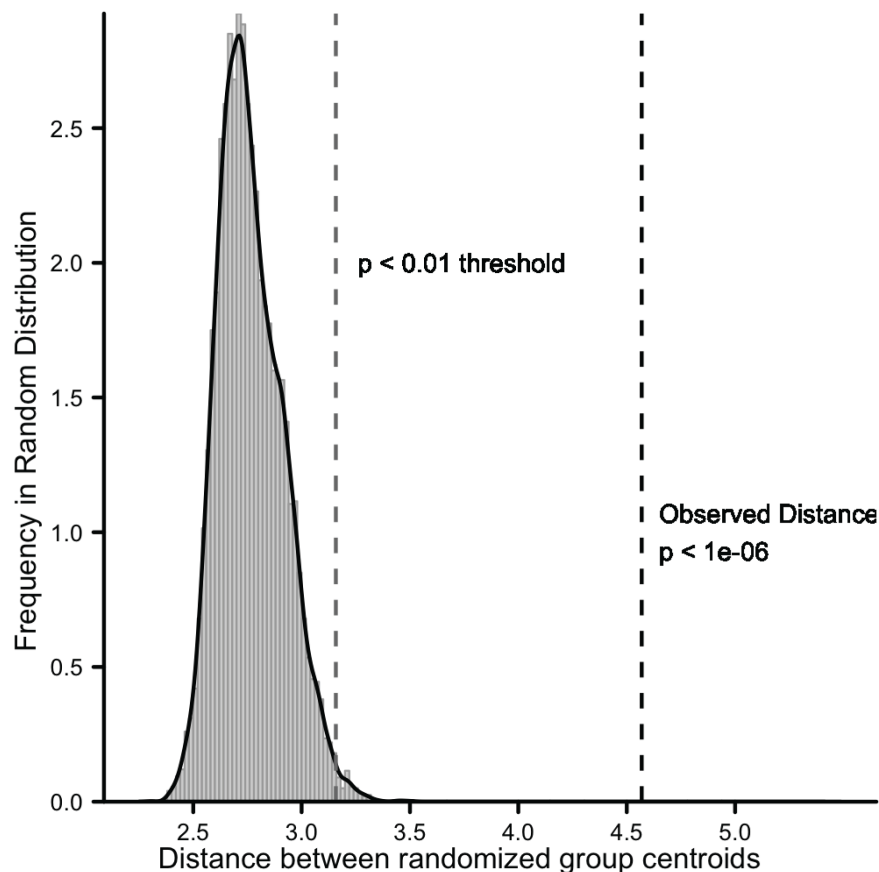

**Figure 6. Monte Carlo results for the separation distance between group means in the MDS-LDA analysis of residual word distance between free-living and pathogenic bacteria.** Plot shows a frequency distribution for the mean separation between groups over 10 k iterations. The  $p=0.01$  and  $p=1e^{-06}$  boundaries are indicated. doi:10.1371/journal.pone.0096910.g006

distribution of word distance where the PATH repeat bin is greater than free-living organisms (closed circles) or vice versa (open circles) suggests fundamental differences in word usage architecture among the groups. These differences were subsequently analyzed using a series of statistical tests.

In comparing word distance among genomes after size normalization, differences in word repeat distributions at a global level could be a function of organism lifestyle. That is, there is some global selection pressure, for example, to reduce GC content and streamline the genome as an adaptive mechanism to thrive in an environment like the oligotrophic ocean [15,16,26] or in obligate intracellular organisms (Figure 4a) [13,27]. These distributions are not evident in the respective randomized genomes (Figure 4b). Word repeat distributions also could arise from gene duplications, deletions, recombination, point mutation, horizontal transfer, and random genetic drift. Regardless, our results suggest that there are quantifiable differences in the representation of amino acid words between FREE and PATH genomes that have appeared during their evolution.

We employed multidimensional scaling analysis on word distance vectors coupled with a linear discriminant function analysis [34]. This enabled us to assess differences in amino acid word usage patterns among individual genomes in the FREE and PATH groups (Figure 5). We utilized this test because of its sensitivity in detecting group-level structures or patterns where group identities are known already. We used a Monte Carlo permutation test on the distance between group centroids to

determine random probability of the observed separation between group centroids (Figure 6). Separation among individual genomes into FREE and PATH distributions along the LDA axis was highly significant ( $p < 10^{-6}$  indicated by the gray box). The group mean differences in Figure 5 indicate that FREE and PATH amino acid word usage patterns are fundamentally different and can be used to characterize the groups. These differences are not merely a function of differences in amino acid composition, genome size or G+C content because they are absent in each randomized genome where these parameters are preserved. Furthermore, the impact of phylogenetic ancestry on the analysis is minimal. In Figure 5, we highlighted the FREE and PATH genomes from the largest three groups [Alphaproteobacteria ( $n=119$ ), Gammaproteobacteria ( $n=237$ ) and Firmicutes ( $n=206$ )]. Phylogenetic group identity of each genome is color coded, and we see that despite broad phylogenetic differences among these genomes, there is no coherent expression of a phylogenetic signal between FREE and PATH functional groups.

The significance of these findings is that, through time, specific sequence blocks may be preferentially retained in a genome among heterologous genes through any of a variety of mechanisms (Figure 1) as has been recently shown with experimental data [29]. Retention of these redundant motifs is a hallmark of free-living genomes and allows us to differentiate these genomes from pathogen genomes (Figures 5 and 6). On a global level, across an entire genome, our results suggest that repeat elements in a genome may be retained more frequently in highly interactive

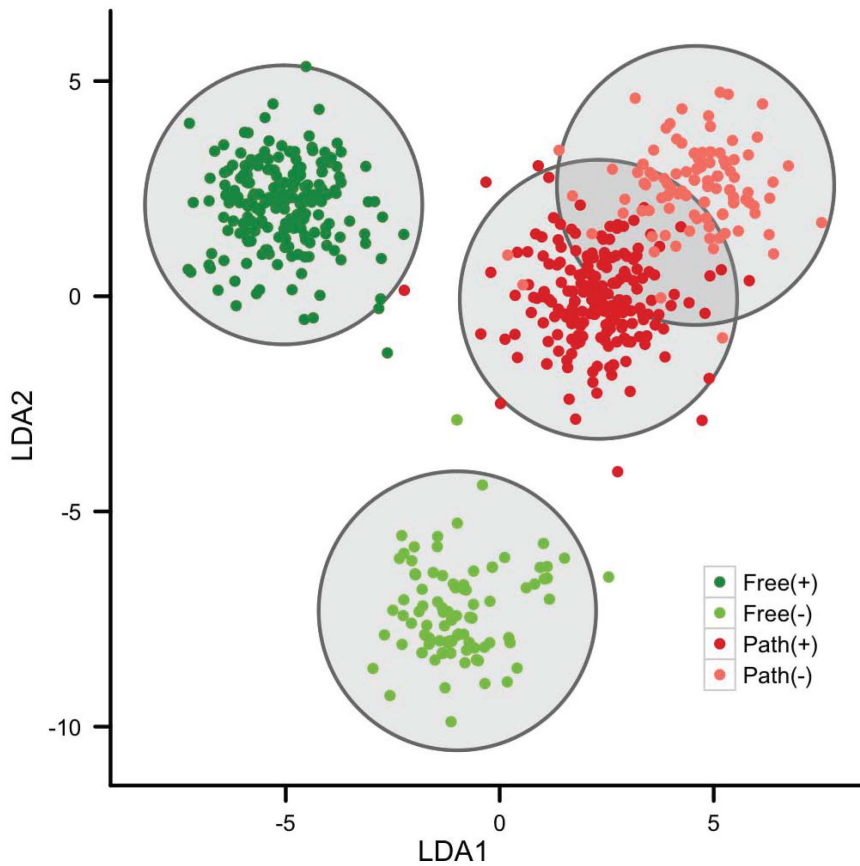

**Figure 7. Non-metric multidimensional scaling analysis of amino acid word usage in microbial genomes divided by lifestyle (free-living vs. pathogenic) and gram-staining (+ vs -).** A linear discriminate analysis of the MDS coordinates was utilized for Monte Carlo, bootstrap iterations (10,000) of the separation among group centroids when observations are randomly distributed among groups. Probability values indicate the likelihood that the observed centroid separation could arise by random chance alone, and the ( $p < 1e-06$ ) values are indicated by the gray circles. doi:10.1371/journal.pone.0096910.g007

environments such as soil or ocean microbiomes, and that in such dynamic environments, genomes evolve with increasing complexity or order. Motif diversity decreases and the frequency of preferential motifs increases in dynamic environments. For example, organisms well-adapted to a copiotrophic (high-nutrient), dynamic environment have distinct genomic features compared to organisms well-adapted to low-nutrient, almost steady-state environments [26]. Especially in single celled free-living organisms, we think a more accurate model of genome architecture that accounts for both fitness and genotypic diversity is based on the modular or motif-driven nature of genes and proteins.

The persistent repetition of amino acid words in free-living organisms is significantly greater than in pathogens (Figure 3). The higher repetition of words in the genomes of free-living organisms than in the genomes of pathogens indicates that, in comparison, free-living microbes appear to be subjected to greater functional and structural constraints on their proteins than pathogens. While the relative simplicity of life as a pathogen has been suggested [10], our results provide a quantitative and statistically robust analysis of differences in genome structure (complexity) and suggest that a first principle of genome architecture is a fundamental sequence bias toward redundant amino acid motifs and domains (word-sequence building blocks). This reveals a mechanistic constraint on genomes in organisms that have specific lifestyles (free-living) and tolerate specific environmental conditions (e.g., high temperature)

as has been recently shown for marine microbes that live in high- and low-nutrient waters [15,26].

Analysis of amino acid word usage patterns can delineate more refined functional groupings than just free-living vs. pathogenic microbes. If environmental communication is an important selection force differentiating free-living from pathogen microbes, then we expect cell wall structure, biosynthesis and signaling mechanisms to contribute toward overall fitness. Figure 7 presents the further separation of free-living and pathogen bacteria into gram positive and negative groups. There is remarkable separation between free-living gram positive and negative groups compared to each other and both groups of pathogens. Separation among the gram positive and negative pathogens is less distinct. Metrics of how word sequences are utilized within a genome may be able to capture differences in higher-level fitness functions such as cell to environment communication, or at least analyses such as this may establish relevant hypotheses for further pursuit and validation. In Figure 5, it is intriguing to ask if the selective value of a cell wall is more positive (or negative) for free-living organisms compared to pathogens. Forces of host and self-recognition may be common evolutionary drivers across broad groups of pathogens. Delving into word usage patterns among cell wall proteins, signal receptors and signal transduction could be a fruitful informatic approach to further understand this delineation.

As an example of the power of examining deviations in word usage, and using this technique to better define the architecture of

**Table 2.** Comparison of the shared amino acid 6-mer words with the greatest average sequence score among gram-positive free-living (Free) and pathogenic (Path) microbes.

| Rank               | Word   | Score | CDD <sup>1</sup> | DB <sup>2</sup> | Description                                                                                                              | E-value |
|--------------------|--------|-------|------------------|-----------------|--------------------------------------------------------------------------------------------------------------------------|---------|
| <b>PATHOGENS</b>   |        |       |                  |                 |                                                                                                                          |         |
| 1                  | DLAGIG | 373.6 | 100866           | PRK01390        | UDP-N-acetylmuramoyl-L-alanyl-D-glutamate synthetase                                                                     | 26      |
| 2                  | PLADLL | 255.0 | 118395           | pfam09865       | Predicted periplasmic protein (DUF2092)                                                                                  | 14      |
| 3                  | SGLGLY | 246.6 | 115888           | pfam07262       | Protein of unknown function (DUF1436). This family consists of several hypothetical bacterial proteins                   | 19      |
| 4                  | IPVDGE | 241.4 | 88415            | cd05798         | Transaldolase (TAL)/ Phosphoglucose isomerase (PGI); Involved with the the microbial conversion of D-arabitol to xylitol | 7.9     |
| 5                  | IRDDLI | 232.5 | 102253           | PRK06207        | Aspartate aminotransferase                                                                                               | 4.4     |
| 6                  | MILLGI | 228.3 | 110765           | pfam01790       | Prolipoprotein diacylglyceryl transferase                                                                                | 4.4     |
| 7                  | KQALKD | 226.4 | 107063           | PHA01750        | Hypothetical protein                                                                                                     | 14      |
| 8                  | TVTADR | 211.7 | 115489           | pfam06835       | Protein of unknown function (DUF1239). This family consists of several hypothetical bacterial proteins                   | 14      |
| 9                  | RINELA | 208.0 | 101064           | PRK02539        | Hypothetical protein                                                                                                     | 7.9     |
| 10                 | GHPDVF | 204.6 | 31444            | COG1252         | NADH dehydrogenase, FAD-containing subunit                                                                               | 19      |
| <b>FREE-LIVING</b> |        |       |                  |                 |                                                                                                                          |         |
| 1                  | TYAELD | 437.3 | 103683           | PRK09088        | Acyl-CoA synthetase                                                                                                      | 5.9     |
| 2                  | GVLPRP | 307.6 | 105426           | PRK11824        | Polynucleotide phosphorylase/polyadenylase                                                                               | 14      |
| 3                  | GASGFL | 295.7 | 106095           | PRK13114        | Tryptophan synthase subunit alpha                                                                                        | 34      |
| 4                  | PLSPAQ | 295.0 | 112395           | pfam03576       | Peptidase family S58                                                                                                     | 14      |
| 5                  | DRPRPA | 283.8 | 105673           | PRK12467        | Peptide synthase                                                                                                         | 5.9     |
| 6                  | IDTATN | 271.4 | 33198            | COG3391         | Uncharacterized conserved protein [function unknown]                                                                     | 11      |
| 7                  | AAPPPP | 257.8 | 115804           | pfam07174       | Bacterial fibronectin-attachment protein (FAP)                                                                           | 11      |
| 8                  | GTPVAG | 254.3 | 104702           | PRK10644        | Arginine: agmatin antiporter                                                                                             | 34      |
| 9                  | IAAGEK | 244.1 | 103529           | PRK08654        | Pyruvate carboxylase subunit A                                                                                           | 26      |
| 10                 | FSGGEK | 240.9 | 104694           | PRK10636        | Putative ABC transporter ATP-binding protein                                                                             | 19      |

NOTE: The gram-positive FREE and PATH dictionaries used in the LDA analysis for Fig. 4 were merged into an "averaged" dictionary of 6-mer amino acid words that were present in both groups. The common 6-mer words with the largest difference (expressed as a ratio) in selection scores between FREE and PATH word distance were aligned against NCBI's Conserved Domain Database to identify potential proteins in which these words appear.

(1) Conserved Domain Database: <http://www.ncbi.nlm.nih.gov/Structure/cdd/cdd.shtml>.

(2) Cross-referenced database entry within CDD.

doi:10.1371/journal.pone.0096910.t002

broad groups of organisms, we compared the shared amino acid six-mer words between gram-positive free-living and gram-positive pathogenic microbes. We calculated the average deviation of a six-mer word's expected probability from its observed frequency in any genome and averaged across each genome in a group. The top ten words shared in common with the greatest deviation in occurrence between gram-positive pathogen and gram-positive free-living organisms are presented in Table 2. These motifs that are either retained more in pathogens or in free-living gram positive genomes point to proteins that can be used to understand differences in the groups. For example, the motif DLAGIG was found far more frequently than expected in pathogen gram-positive genomes. This motif is found in UDP-N-acetylmuramoyl-L-alanyl-D-glutamate synthetase – an important contributor to

cell-wall synthesis. Mutations in this protein confer different resistances to cell-wall targeted antibiotics in gram-positive organisms [35,36]. This observation encompasses a broad set of genomes. We have strong quantitative evidence that a DLAGIG word in enzymes involved with polysaccharide synthesis is significant in gram-positive pathogens. Thus, with this approach, we can link specific amino acid words to specific proteins and then to very specific, functional selection pressures. This information is vital to developing potentially new ways to target pathogens – especially those that are currently drug or multi-drug resistant.

Likewise, these motif statistics can be accumulated for select groups of genomes for comparison. Figure 8 shows COG functional category differences in the cumulative 6–8 mer motifs that are most overrepresented between a group of 42 gram-



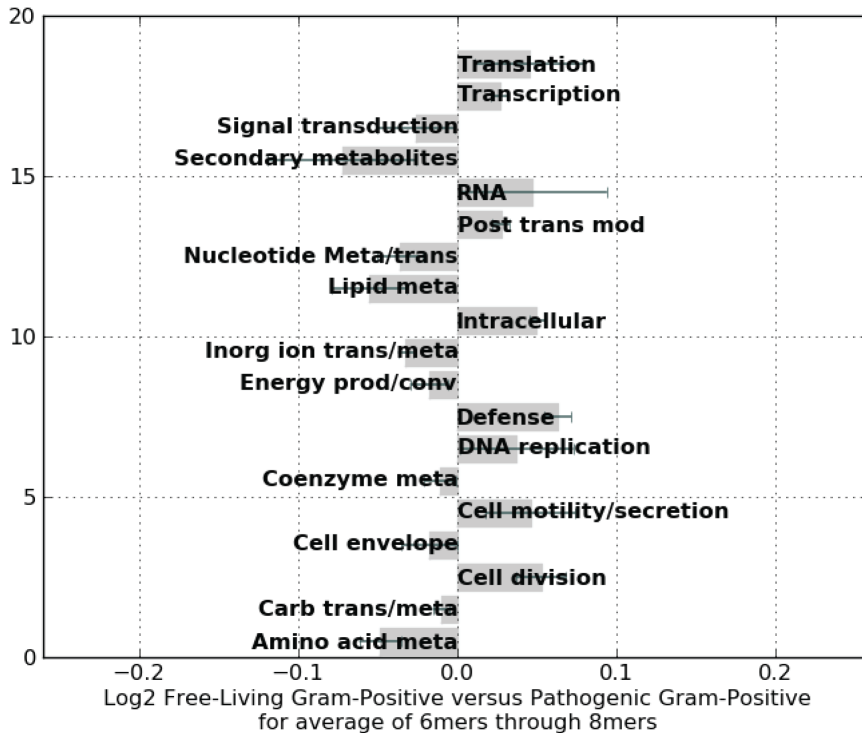

**Figure 8. Distribution of overrepresented words (averaged 6–8 mers) in free-living gram-positive compared to pathogenic gram-positive bacteria.** Each bar represents words overrepresented in free-living (negative) or pathogenic (positive) gram-positive genomes. Genomes utilized in the analysis are listed in Table 3.  
doi:10.1371/journal.pone.0096910.g008

positive pathogens and a group of 42 gram-positive free-living bacteria (Table 3). Here, overrepresented or highly selected motifs appear more often in defense, intracellular and cell division related proteins in gram-positive pathogens compared to proteins in gram-positive free-living bacteria. Highly selected motifs in gram-positive free-living bacteria are found in amino acid and secondary metabolite biosynthesis. Both observations suggest specific hypotheses for further experimental validation based on metabolic cost differences between the two groups and the constant need of pathogens to defend against host immune response.

Our work to assess word usage diversity in proteomes parallels other efforts to describe the potential diversity of protein folds. If amino acid motifs contribute information to a discrete rule set for guiding protein folding, then the finite set of structural folds observed in proteins indicates that amino acid motif utilization is constrained (repetitive) to generate an “ideal form” of a particular protein [37]. Recent efforts to quantify the folding space of proteins suggest the discovery rate of new structural folds is at a plateau [38]. This idea that folding motifs are used over and over again as structural building blocks of proteins implies that the frequencies of amino acid word utilization in a proteome will have some repetitive features related to protein structure/function and lifestyle.

These types of analyses will inform the growing field of synthetic biology [39,40]. The genetic code alone only scratches the surface of complexity in the biological network of a living cell [41,42]. Metrics of genome complexity, redundancy, and degeneracy need to be utilized in synthetic biology and in developing new ways to target pathogens. Linkages between a genome and the environment that have shaped its function must be better understood if we are to engineer new genomes to accomplish specific anthropogenic

goals with the same efficiency of natural genomes that have been subjected to millions of years of evolutionary selection.

## Materials and Methods

### Data Acquisition and Preliminary Processing

Whole genome sequences were downloaded from the NCBI ([www.ncbi.nlm.nih.gov](http://www.ncbi.nlm.nih.gov)). All genome sequences were clustered at 95% amino acid identity using the program CD-HIT to remove duplicate sequences [43,44]. Table S1 lists the genomes that were used in this study with additional information regarding their classification as free-living or pathogenic bacteria. A copy of each genome fasta file was randomized by stringing all the AA residues together, then employing a Fisher-Yates shuffling algorithm to randomize the total AA sequence for 10 successive iterations and then re-dividing the total string back into the number and length of the original ORFs. The randomized genome contained the identical number of genes, gene lengths and amino acid usages as the native genome; the only difference was the amino acid order was randomized.

### Amino Acid Usage

A comparison of amino acid frequencies in whole genome sequences between the two groups was performed. A Welsh’s two-sample t-test was used to compare the mean frequencies and test the likelihood that the difference among FREE and PATH observations was not zero. This statistic establishes a 95% confidence interval around the difference means and assigns significance based on how far the observed arithmetic difference is from zero.

**Table 3.** List of organisms used in the analysis presented in Figure 8.

| <b>Free-living gram positive organisms</b>            | <b>GenBank PID</b> |
|-------------------------------------------------------|--------------------|
| <i>Acidothermus cellulolyticus</i> 11B                | 16097              |
| <i>Anoxybacillus flavithermus</i> WK1                 | 28245              |
| <i>Arthrobacter aurescens</i> TC1                     | 12512              |
| <i>Arthrobacter chlorophenicus</i> A6                 | 20011              |
| <i>Candidatus Desulforudis audaxviator</i> MP104C     | 21047              |
| <i>Clostridium acetobutylicum</i>                     | 77                 |
| <i>Clostridium cellulolyticum</i> H10                 | 17419              |
| <i>Clostridium novyi</i> NT                           | 16820              |
| <i>Clostridium thermocellum</i> ATCC 27405            | 314                |
| <i>Corynebacterium efficiens</i> YS-314               | 305                |
| <i>Corynebacterium glutamicum</i> R                   | 19193              |
| <i>Corynebacterium jeikeium</i> K411                  | 13967              |
| <i>Dehalococcoides</i> BAV1                           | 15770              |
| <i>Dehalococcoides ethenogenes</i> 195                | 214                |
| <i>Deinococcus geothermalis</i> DSM 11300             | 13423              |
| <i>Deinococcus radiodurans</i>                        | 65                 |
| <i>Dictyoglomus turgidum</i> DSM 6724                 | 29175              |
| <i>Geobacillus kaustophilus</i> HTA426                | 13233              |
| <i>Geobacillus thermodenitrificans</i> NG80-2         | 18655              |
| <i>Lactobacillus acidophilus</i> NCFM                 | 82                 |
| <i>Lactobacillus delbrueckii</i> bulgaricus           | 16871              |
| <i>Lactobacillus fermentum</i> IFO 3956               | 18979              |
| <i>Lactobacillus sakei</i> 23K                        | 13435              |
| <i>Listeria innocua</i>                               | 86                 |
| <i>Listeria welshimeri</i> serovar 6b SLCC5334        | 13443              |
| <i>Mycobacterium</i> JLS                              | 16079              |
| <i>Mycobacterium</i> KMS                              | 16081              |
| <i>Salinispora arenicola</i> CNS-205                  | 17109              |
| <i>Salinispora tropica</i> CNB-440                    | 16342              |
| <i>Streptomyces avermitilis</i>                       | 189                |
| <i>Streptomyces coelicolor</i>                        | 242                |
| <i>Streptomyces griseus</i> NBRC 13350                | 20085              |
| <i>Symbiobacterium thermophilum</i> IAM14863          | 12994              |
| <i>Thermoanaerobacter pseudethanolicus</i> ATCC 33223 | 13901              |
| <b>Pathogenic gram positive organisms</b>             | <b>GenBank PID</b> |
| <i>Bacillus anthracis</i> Ames 0581                   | 10784              |
| <i>Bacillus cereus</i> B4264                          | 17731              |
| <i>Bacillus thuringiensis</i> AI Hakam                | 18255              |
| <i>Bacillus weihenstephanensis</i> KBAB4              | 13623              |
| <i>Bacteroides vulgatus</i> ATCC 8482                 | 13378              |
| <i>Clavibacter michiganensis</i> NCPPB 382            | 19643              |
| <i>Clostridium botulinum</i> E3 Alaska E43            | 28855              |
| <i>Clostridium difficile</i> 630                      | 78                 |
| <i>Clostridium perfringens</i>                        | 79                 |
| <i>Clostridium tetani</i> E88                         | 81                 |
| <i>Corynebacterium diphtheriae</i>                    | 87                 |
| <i>Corynebacterium urealyticum</i> DSM 7109           | 29211              |
| <i>Enterococcus faecalis</i> V583                     | 70                 |
| <i>Listeria monocytogenes</i> HCC23                   | 29409              |

**Table 3. Cont.**

| Pathogenic gram positive organisms               | GenBank PID |
|--------------------------------------------------|-------------|
| <i>Lysinibacillus sphaericus</i> C3 41           | 19619       |
| <i>Mycobacterium abscessus</i> ATCC 19977T       | 15691       |
| <i>Mycobacterium bovis</i>                       | 89          |
| <i>Mycobacterium marinum</i> M                   | 16725       |
| <i>Mycobacterium smegmatis</i> MC2-155           | 92          |
| <i>Parabacteroides distasonis</i> ATCC 8503      | 13485       |
| <i>Propionibacterium acnes</i> KPA171202         | 12460       |
| <i>Renibacterium salmoninarum</i> ATCC 33209     | 19227       |
| <i>Staphylococcus aureus</i> RF122               | 63          |
| <i>Staphylococcus eermidis</i> RP62A             | 64          |
| <i>Staphylococcus haemolyticus</i>               | 12508       |
| <i>Staphylococcus saprophyticus</i>              | 15596       |
| <i>Streptococcus gordonii</i> Challis substr CH1 | 66          |
| <i>Streptococcus sanguinis</i> SK36              | 13942       |
| <i>Streptococcus suis</i> 98HAH33                | 17155       |
| <i>Streptococcus uberis</i> 0140J                | 353         |
| <i>Thermobifida fusca</i> YX                     | 94          |
| <i>Tropheryma whipplei</i> Twist                 | 95          |
| <i>Ureaplasma parvum</i> serovar 3 ATCC 27815    | 19087       |
| <i>Ureaplasma urealyticum</i>                    | 1           |

doi:10.1371/journal.pone.0096910.t003

### Dictionary Processing

For each dictionary (both native and randomized), amino acids words from 2-to-12 mers were counted and retained if a word were repeated at least twice. We calculated an “expected” count for each word as the average probability of randomly combining the N-1 submers (based on observed frequency of the N-1 submer) with the terminal amino acid residue (based on observed amino acid composition). These are similar methods to those published previously [28,33]. We calculated the deviation between observed and expected counts within a dictionary as a residual distance (for each word in each genome, the perpendicular distance of the OBS and EXP values from a null selection line of a 1:1 equilibrium). As an example, these observed counts and residual distances are plotted in Figure 1 for *E. coli* O157. A genome-wide statistic for summarizing total departure between observed and expected word counts was calculated as a summation of all the individual word residual distances. The residual distance is defined as:

$$d_i = \left( \frac{\sqrt{2 \times (\ln(OBS_i) - \ln(EXP_i))^2}}{2} \right)^2 \quad (1)$$

From this, the summation of all the individual word residual distances for words of length  $i = 1$  to  $N$  follows as:

$$WordD = \sum_{i=1}^N \frac{d_i}{N} \quad (2)$$

Repeat counts in Figure 4 were derived from observed counts in the 2-to-12 mer dictionaries. Observed counts were parsed into  $i$  bins, where the value in each bin represents the number of unique words repeated  $i$  times (e.g., the 10<sup>th</sup> bin contains the number of words in a dictionary [across all N-mers] that were repeated 10 times). This approach reduced the typical dictionary size from 500,000 words to a 30,000 element vector. More importantly, this vectorization allowed a direct comparison between all genomes, which would be extremely complex with the raw dictionaries. Bin counts were then normalized to the number of total amino acids present in the non-redundant fasta file. The Fmean and Pmean vectors were calculated as the simple mean of each bin position for all FREE and PATH genomes, respectively. The linear discriminant analyses using the normalized repeat count vectors (Figures 4 and 5) were run with two different MDS-LDA approaches: 1) a custom script in MatLab using the “Statistical Pattern Recognition Tools” package (STPRTool; <http://cmp.felk.cvut.cz/cmp/software/stprtool/>), and 2) the “Multiple Response Permutation Procedure” (MRPP) in the VEGAN package for R Statistics. Both approaches provided nearly identical results. In both MatLab and R, we added an iterative (10 k), Monte Carlo randomization to each script to define the distribution in the random separation between group centroids (Figure 6). To ensure that there were no effects related to chromosome number, pathogenicity islands or plasmids with high concentration of genes from specific functional categories, we repeated the entire analysis on genomes with only one chromosome and no plasmids. The results were similar to Figure 6 and are not shown. This subset contained 482 genomes with 243 free-living and 239 pathogens. The overall variance in word usage data was less variable within this smaller group, and consequently the MDS-LDA analyses revealed differences between the groups that were more statistically significant, although we only report significance here at the  $p < 1e^{-06}$  level.

## Supporting Information

**Table S1 Free-living and pathogenic bacteria used in analyses.**  
(HTML)

## Acknowledgments

We thank R. Kreidberg for editorial assistance and the DRI IT staff for support.

## References

- Fleischmann RD, Adams MD, White O, Clayton RA, Kirkness EF, et al. (1995) Whole-genome random sequencing and assembly of *Haemophilus influenzae* rd. *Science* 269: 496–512.
- Moran MMA, Buchan A, González MJ, Heidelberg JF, Whitman WWB, et al. (2004) Genome sequence of *Silicibacter pomeroyi* reveals adaptations to the marine environment. *Nature* 432: 910–913.
- Rabus R, Ruepp A, Frickey T, Rattei T, Fartmann B, et al. (2004) The genome of *Desulfotalea psy-chrophila*, a sulfate-reducing bacterium from permanently cold Arctic sediments. *Environ Microbiol* 6: 887–902.
- Rocap G, Larimer FW, Lamerdin J, Malfatti S, Chain P, et al. (2003) Genome divergence in two *Prochlorococcus* ecotypes reflects oceanic niche differentiation. *Nature* 424: 1042–7.
- Tyson G, Chapman J, Hugenholtz P, Allen E, Ram R, et al. (2004) Community structure and metabolism through reconstruction of microbial genomes from the environment. *Nature* 428: 37–43.
- D'Hondt S, Jørgensen BB, Miller DJ, Batzke A, Blake R, et al. (2004) Distributions of microbial activities in deep seafloor sediments. *Science* 306: 2216–21.
- Lin LH, Wang PL, Rumble D, Lippmann-Pipke J, Boice E, et al. (2006) Long-term sustainability of a high-energy, low-diversity crustal biome. *Science* 314: 479–482.
- Drubin DA, Way JC, Silver PA (2007) Designing biological systems. *Genes & development* 21: 242–54.
- Forster AC, Church GM (2007) Synthetic biology projects in vitro. *Genome res* 17: 1–6.
- Fraser CM, Gocayne JD, White O, Adams MD, Clayton RA, et al. (1995) The minimal gene complement of *Mycoplasma genitalium*. *Science* 270: 397–403.
- Glass JI, Assad-Garcia N, Alperovich N, Yooseph S, Lewis MR, et al. (2006) Essential genes of a minimal bacterium. *Proc Natl Acad Sci USA* 103: 425–30.
- Mushegian AR, Koonin EV (1996) A minimal gene set for cellular life derived by comparison of complete bacterial genomes. *Proc Natl Acad Sci USA* 93: 10268–73.
- Ochman H, Moran NA (2001) Genes lost and genes found: evolution of bacterial pathogenesis and symbiosis. *Science* 292: 1096–9.
- Andersson SG, Kurland CG (1998) Reductive evolution of resident genomes. *Trends microbiol* 6: 263–8.
- Grzymalski JJ, Dussaq AM (2012) The significance of nitrogen cost minimization in proteomes of marine microorganisms. *ISME J* 6: 71–80.
- Swan BK, Tupper B, Sczyrba A, Lauro FM, Martinez-Garcia M, et al. (2013) Prevalent genome streamlining and latitudinal divergence of planktonic bacteria in the surface ocean. *Proc Natl Acad Sci USA* 10.1073/pnas.1304246110.
- Giovanoni SJ, Tripp HJ, Givan S, Podar M, Vergin KL, et al. (2005) Genome streamlining in a cosmopolitan oceanic bacterium. *Science (New York, NY)* 309: 1242–5.
- Adami C (2012) The use of information theory in evolutionary biology. *Ann NY Acad Sci* 1256: 49–65.
- Frank SA (2009) Natural selection maximizes fisher information. *J Evol Biol* 22: 231–44.
- Liu Z, Venkatesh SS, Maley CC (2008) Sequence space coverage, entropy of genomes and the potential to detect non-human DNA in human samples. *BMC Genomics* 9: 509.
- Pevzner PA, Borodovsky MYU, Mironov AA (1989) Linguistics of nucleotide sequences. II: Stationary words in genetic texts and the zonal structure of DNA. *J Biomol Struct Dyn* 6: 1027–38.
- Csurös M, Noé L, Kucherov G (2007) Reconsidering the significance of genomic word frequencies. *Trends Genet* 23: 543–6.
- Sadovsky MG, Putintseva JA, Shchepanovsky AS (2008) Genes, information and sense: complexity and knowledge retrieval. *Theory Biosci* 127: 69–78.
- Petrokovski S, Henikoff JG, Henikoff S (1996) The blocks database—a system for protein classification. *Nucleic Acids Res* 24: 197–200.
- Mora T, Walczak AM, Bialek W, Callan CG (2010) Maximum entropy models for antibody diversity. *Proc Natl Acad Sci USA* 107: 5405–10.
- Lauro FM, McDougald D, Thomas T, Williams TJ, Egan S, et al. (2009) The genomic basis of trophic strategy in marine bacteria. *Proc Natl Acad Sci USA* 106: 15527–33.
- Moran N (1996) Accelerated evolution and Muller's ratchet in endosymbiotic bacteria. *Proc Natl Acad Sci USA* 93: 2873–2878.
- Pevzner PA, Borodovsky MYU, Mironov AA (1989) Linguistics of nucleotide sequences. I: The significance of deviations from mean statistical characteristics and prediction of the frequencies of occurrence of words. *J Biomol Struct Dyn* 6: 1013–26.
- McLaughlin RN Jr, Poelwijk FJ, Raman A, Gosal WS, Ranganathan R (2012) The spatial architecture of protein function and adaptation. *Nature* 491: 138–42.
- Dufton MJ (1997) Genetic code synonym quotas and amino acid complexity: cutting the cost of proteins? *J Theor Biol* 187: 165–73.
- Haney PJ, Badger JH, Buldak GL, Reich CI, Woese CR, et al. (1999) Thermal adaptation analyzed by comparison of protein sequences from mesophilic and extremely thermophilic *Methanococcus* species. *Proc Natl Acad Sci USA* 96: 3578–83.
- Seligmann H (2003) Cost-minimization of amino acid usage. *J Mol Evol* 56: 151–61.
- Barrai I, Volinia S, Scapoli C (1995) The usage of oligopeptides in proteins correlates negatively with molecular weight. *Int J Prot Res* 45: 326–331.
- Friedman J (1989) Regularized discriminant analysis. *J Am Stat Assoc* 84: 165–175.
- Boneca IG, Xu N, Gage DA, de Jonge BL, Tomasz A (1997) Structural characterization of an abnormally cross-linked mucopeptide dimer that is accumulated in the peptidoglycan of methicillinand cefotaxime-resistant mutants of *Staphylococcus aureus*. *J Biol Chem* 272: 29053–9.
- de Jonge BL, Tomasz A (1993) Abnormal peptidoglycan produced in a methicillin-resistant strain of *Staphylococcus aureus* grown in the presence of methicillin: functional role for penicillin-binding protein 2a in cell wall synthesis. *Antimicrob Agents Chemother* 37: 342–6.
- Denton M, Marshall C (2001) Protein folds: laws of form revisited. *Nature* 410: 417.
- Jaroszewski L, Li Z, Krishna SS, Bakolitsa C, Wooley J, et al. (2009) Exploration of uncharted regions of the protein universe. *PLoS Biol* 7: e1000205.
- Gibson DG, Benders GA, Andrews-Pfannkoch C, Denisova EA, Baden-Tillson H, et al. (2008) Complete chemical synthesis, assembly, and cloning of a *Mycoplasma genitalium* genome. *Science* 319: 1215–20.
- Szostak JW, Bartel DP, Luisi PL (2001) Synthesizing life. *Nature* 409: 387–90.
- Tononi G, Sporns O, Edelman GM (1999) Measures of degeneracy and redundancy in biological networks. *Proc Natl Acad Sci USA* 96: 3257–62.
- Edelman GM, Gally JA (2001) Degeneracy and complexity in biological systems. *Proc Natl Acad Sci USA* 98: 13763–8.
- Li W, Jaroszewski L, Godzik A (2001) Clustering of highly homologous sequences to reduce the size of large protein databases. *Bioinformatics* 17: 282–283.
- Li W, Jaroszewski L, Godzik A (2002) Tolerating some redundancy significantly speeds up clustering of large protein databases. *Bioinformatics* 18: 77–82.

## Author Contributions

Conceived and designed the experiments: JJG AGM. Performed the experiments: JJG AGM. Analyzed the data: JJG AGM. Contributed reagents/materials/analysis tools: JJG AGM. Wrote the paper: JJG AGM.
